# Supplementary material for: Preparation of the Hybrids of Hydrotalcites and Chitosan by Urea Method and Their Antimicrobial Activities
Source: MDPI journal article supplement (doi:10.3390/polym11101588), 2019-09-28
Supplement: s1 [file s1]

## Supplementary material

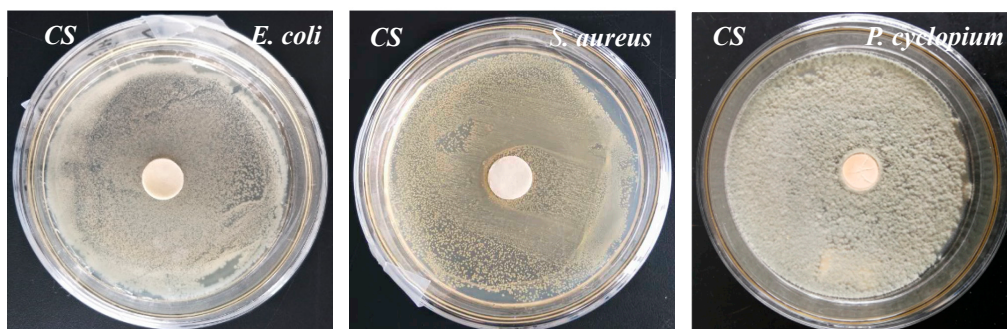

**Fig s1** Inhibition zones of the pure chitosan
